# Supplementary material for: Analysis of the Effect of Increased α2,3-Sialylation on RTK Activation in MKN45 Gastric Cancer Spheroids Treated with Crizotinib
Source: Int J Mol Sci. 2020 Jan 22;21(3):722. doi: 10.3390/ijms21030722 (PMC7037121; doi:10.3390/ijms21030722)
Supplement: Supplementary file 1 [file ijms-21-00722-s001.pdf]

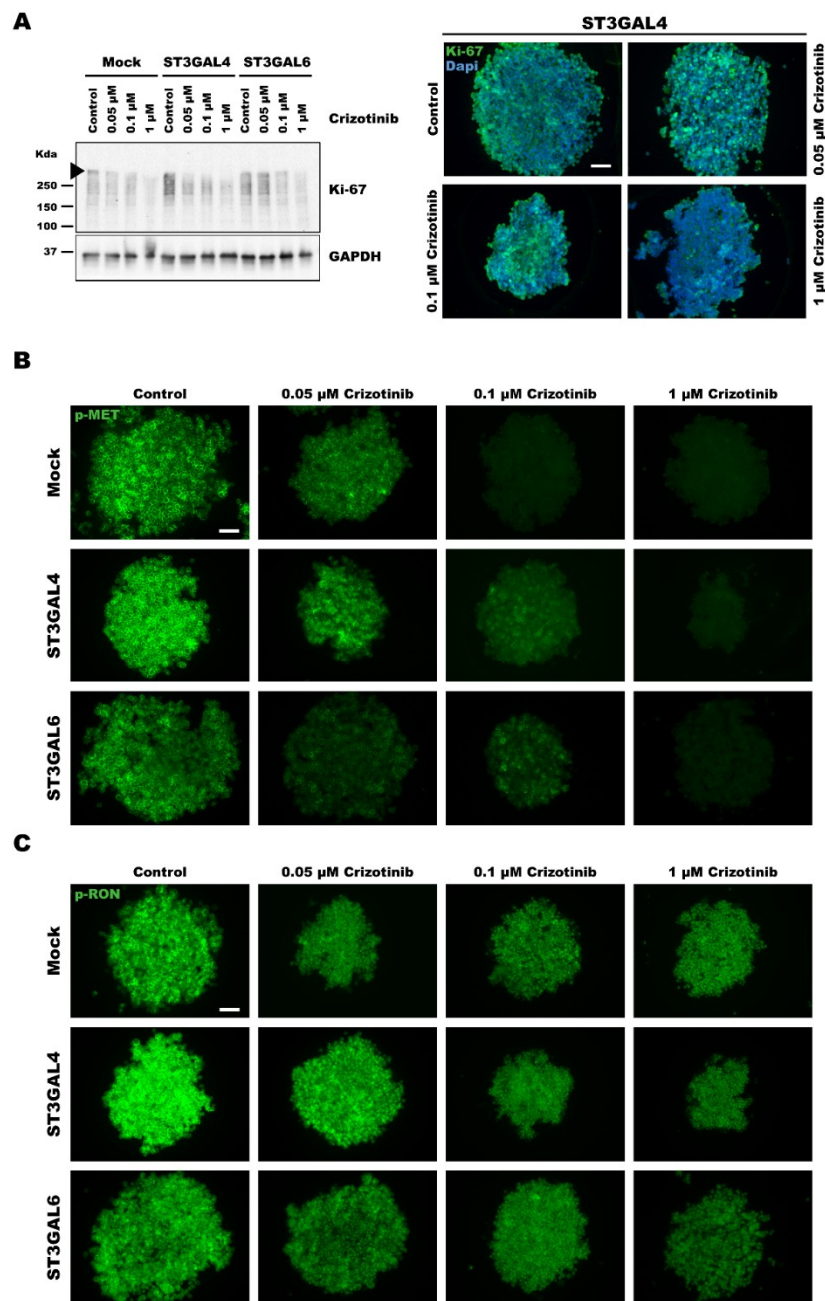

**Figure 1.** Analysis of the response to TKI treatment crizotinib of the  $\alpha 2,3$ -overexpressing cancer cell models grown in 3D. Gastric MCTS were generated using the 3D Petri Dish® technology (MICROTISSUES®) for 5 days and treated with different concentrations of PHA-665257 for 48 h. (A) Western blot and immunofluorescent staining of the proliferation marker Ki-67 of gastric MCTS (B-C). Immunofluorescent staining of (B) pMET and (C) pRON of the treated gastric MCTS. Scale bar represents 50  $\mu$ m.

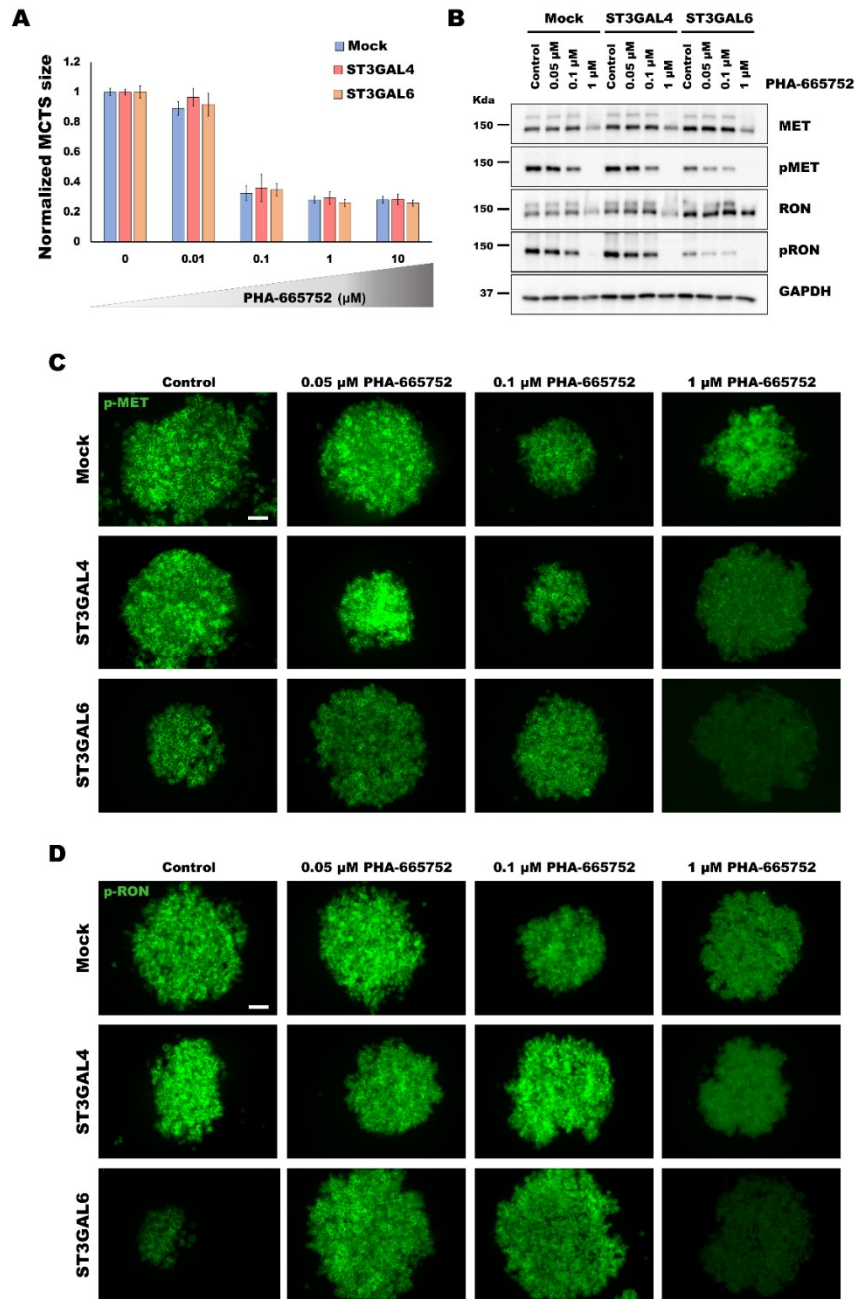

**Figure S2. Analysis of the response to TKI PHA-665752 treatment of the  $\alpha 2,3$ -overexpressing cancer cell models grown in 3D. (A)** Gastric multicellular tumor spheroids (MCTS) were generated using ultra-low attachment (ULA) 96-well round-bottomed plates for 5 days and treated with different concentrations of PHA-665257 for 48 h. Response to PHA-665752 treatment evaluated by size using automated image analysis. Graph represents the size variation in each spheroid after 48 h of treatment. Values are means  $\pm$  SD of at least  $n=3$  spheroids. For each condition, 2 independent experiments were performed. **(B-D)** Gastric MCTS were generated using the 3D Petri Dish® technology (MICROTISSUES®) for 5 days and treated with different concentrations of PHA-665257 for 48 h. **(B)** Western blot analysis of MET and RON receptor tyrosine kinase and their activated forms, pMET and pRON. GAPDH was used as a loading control. **(C)** Immunofluorescent staining of pMET and **(D)** pRON of the treated gastric MCTS. Scale bar represents 50  $\mu$ m.
